# Supplementary material
Source: Springer Nature journal article supplement (https://www.springermedizin.de/resource/supplementary/12881_2010_713_MOESM2_ESM.pdf/9450940)

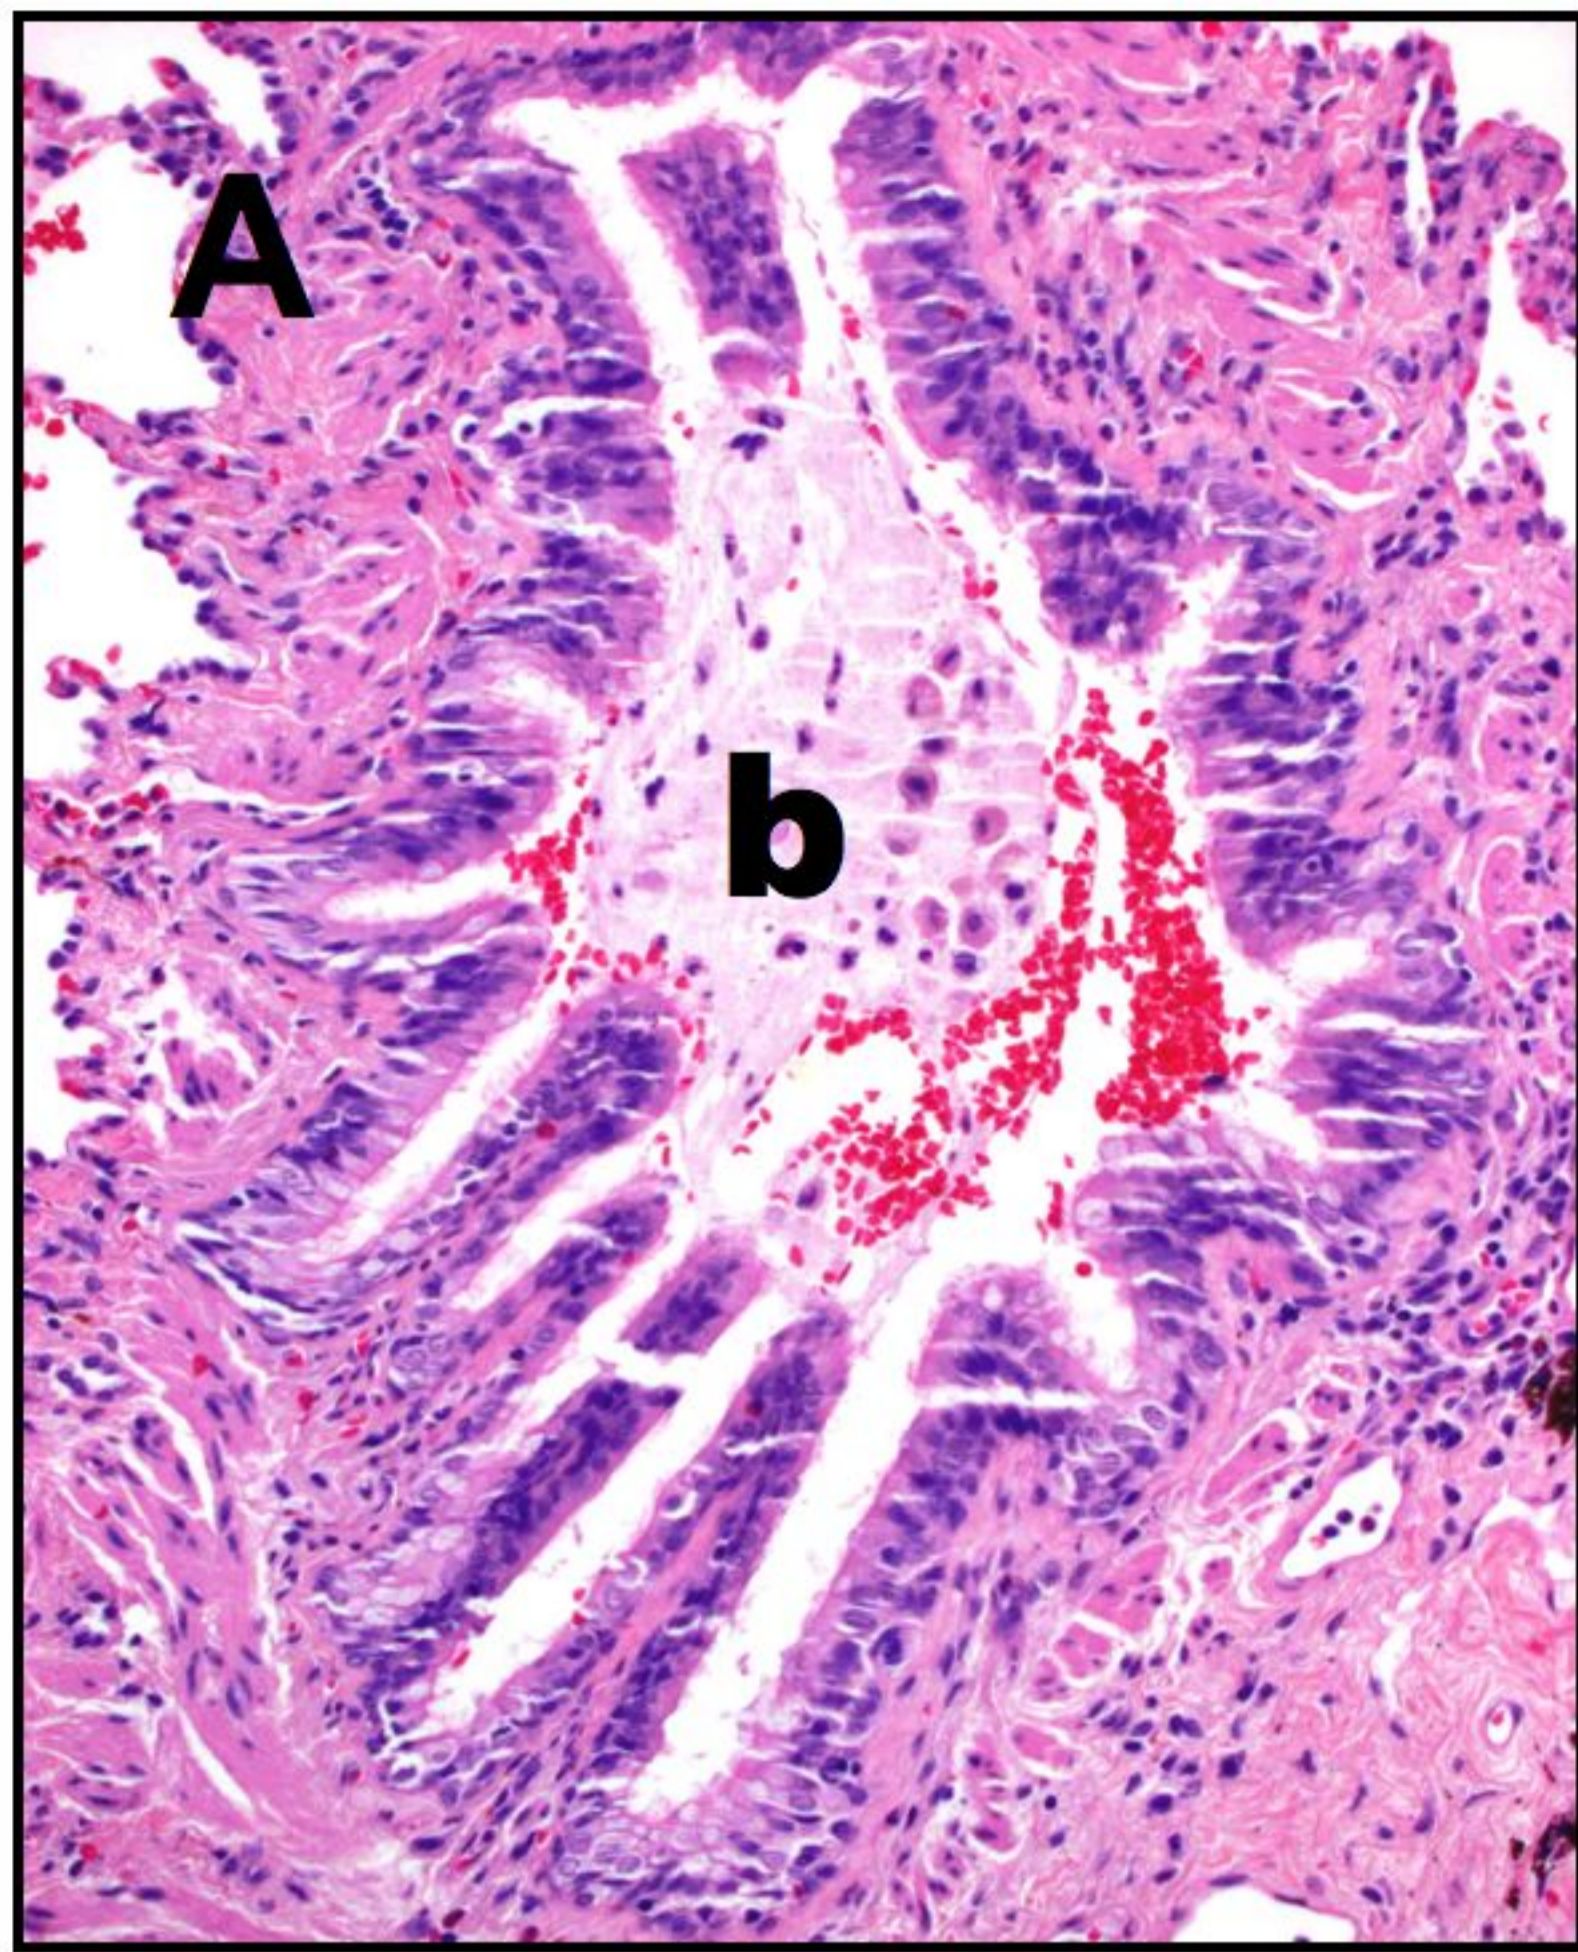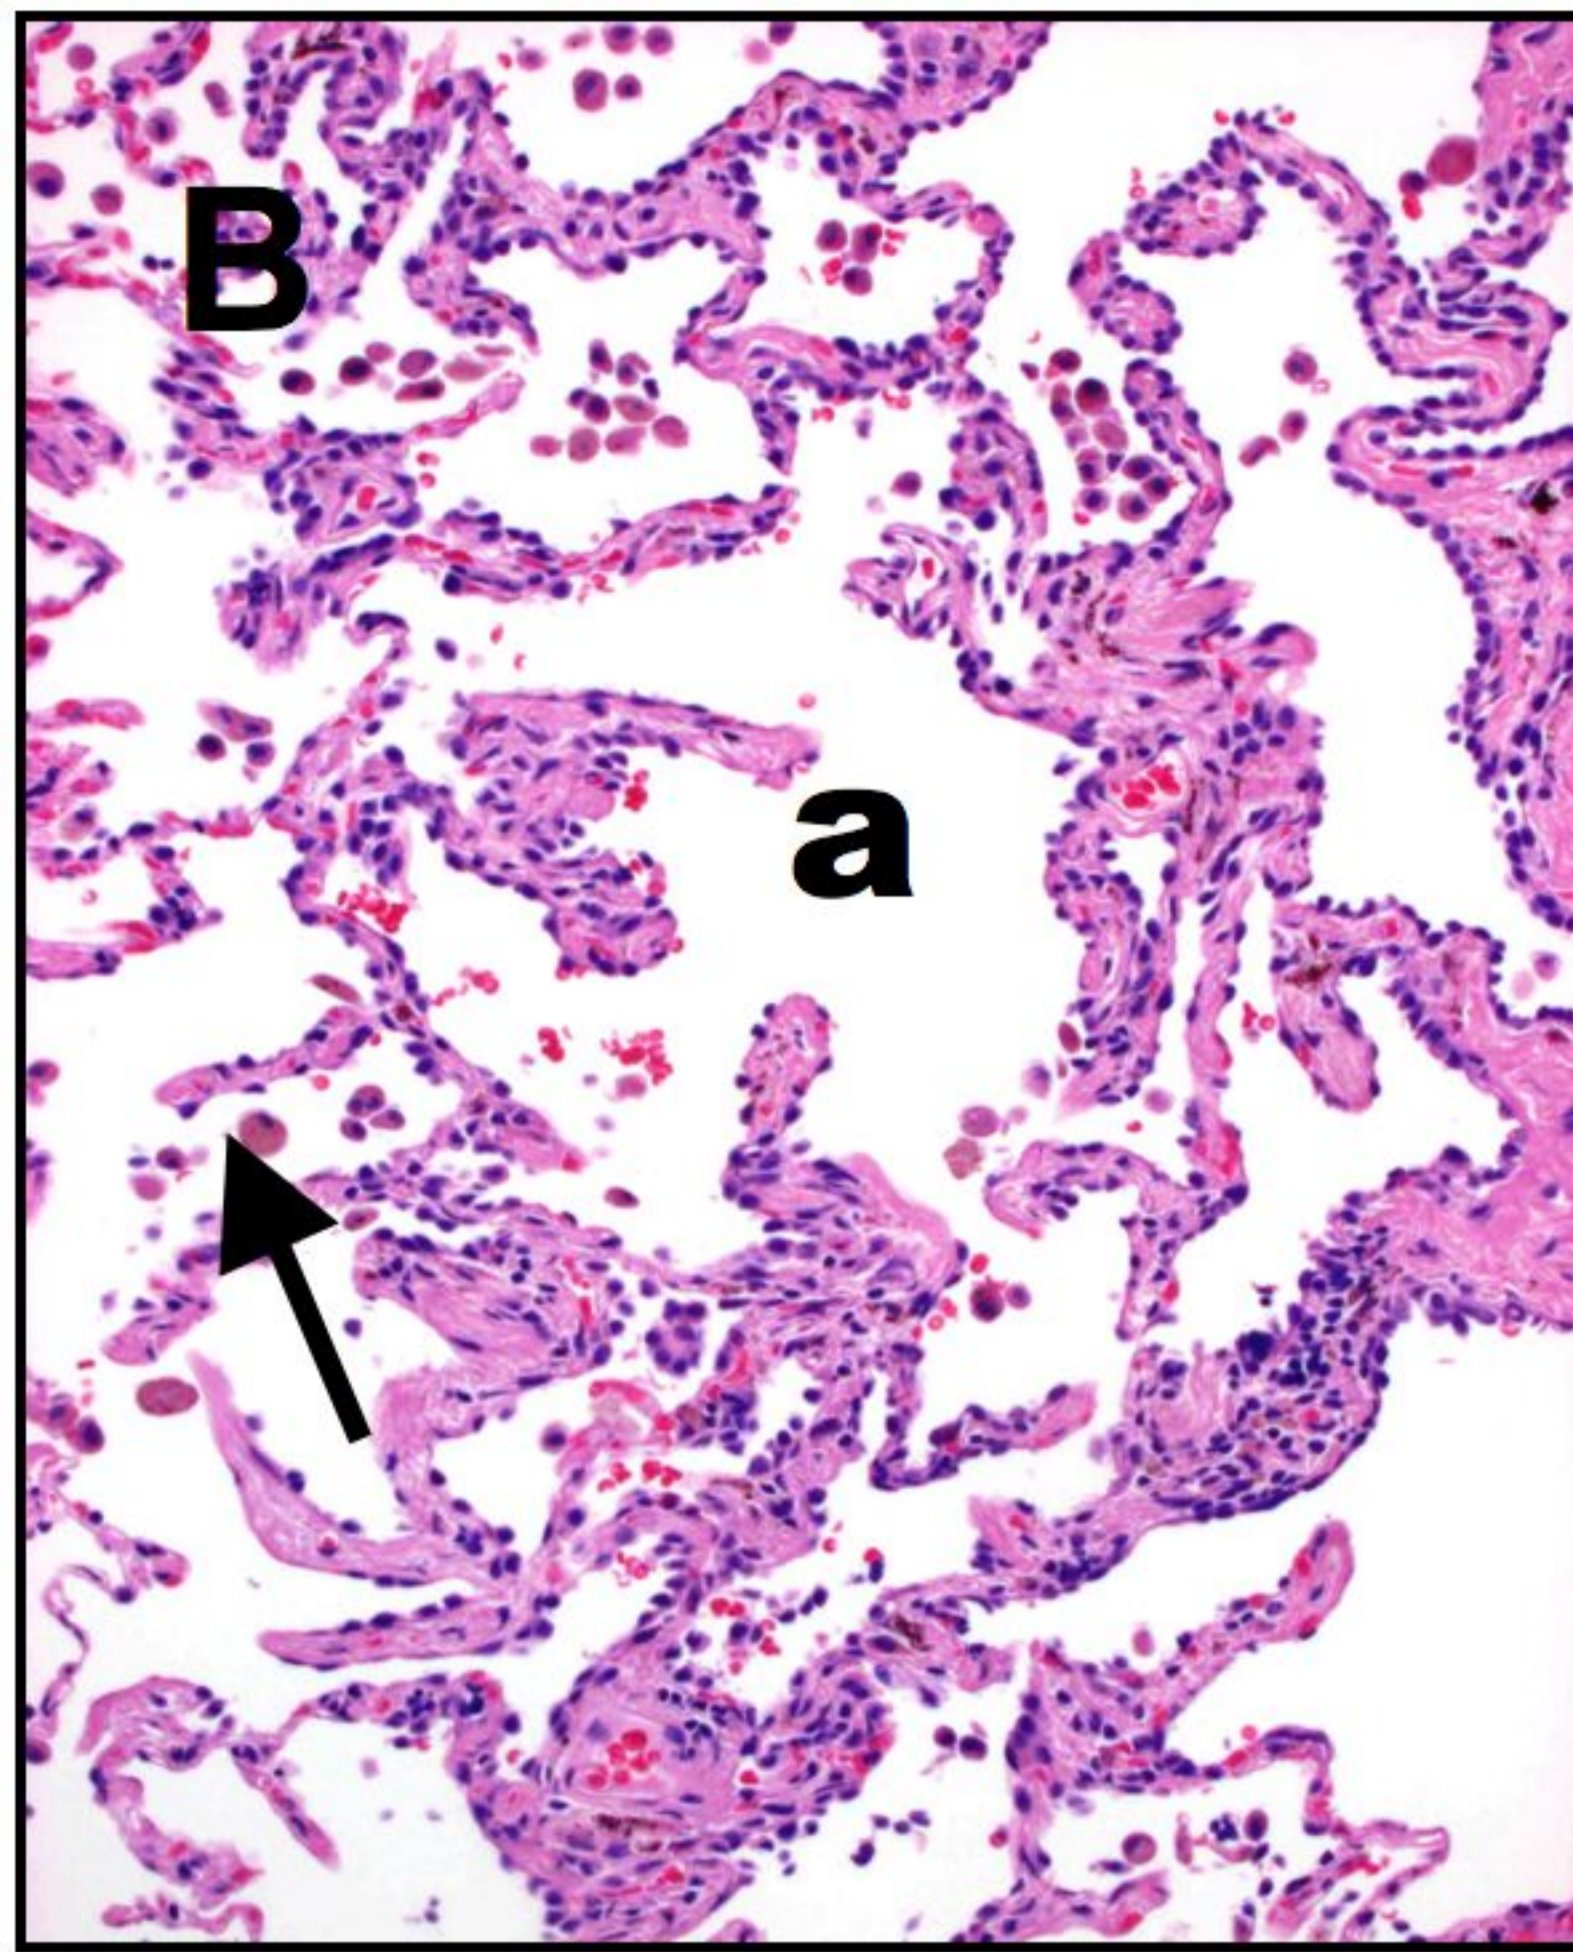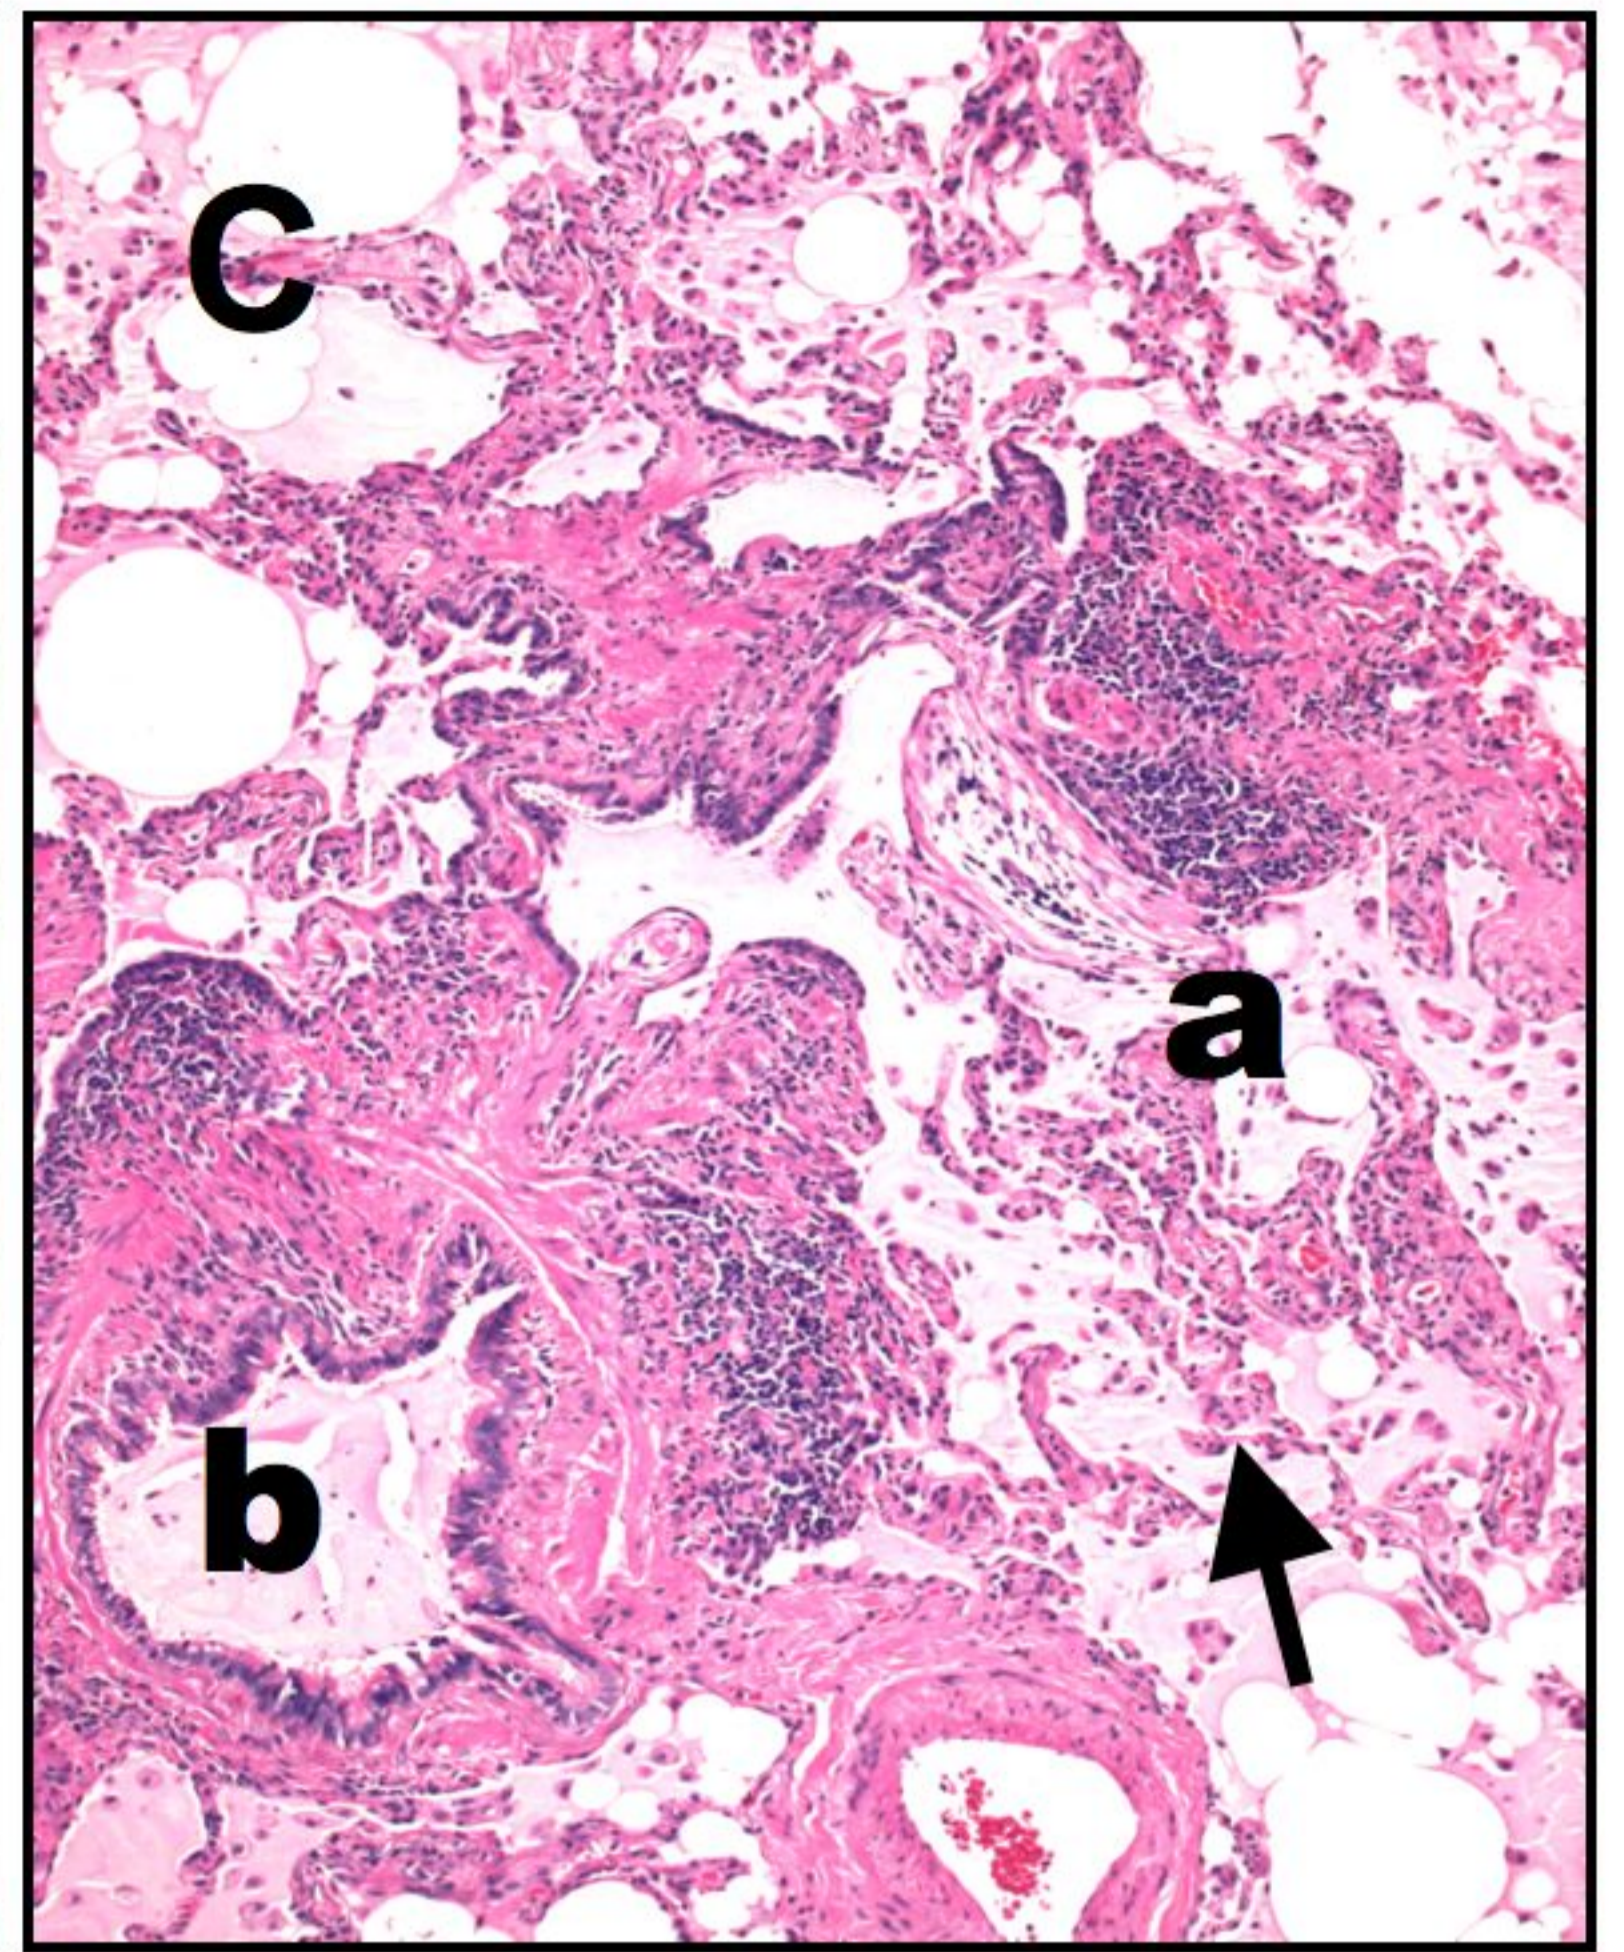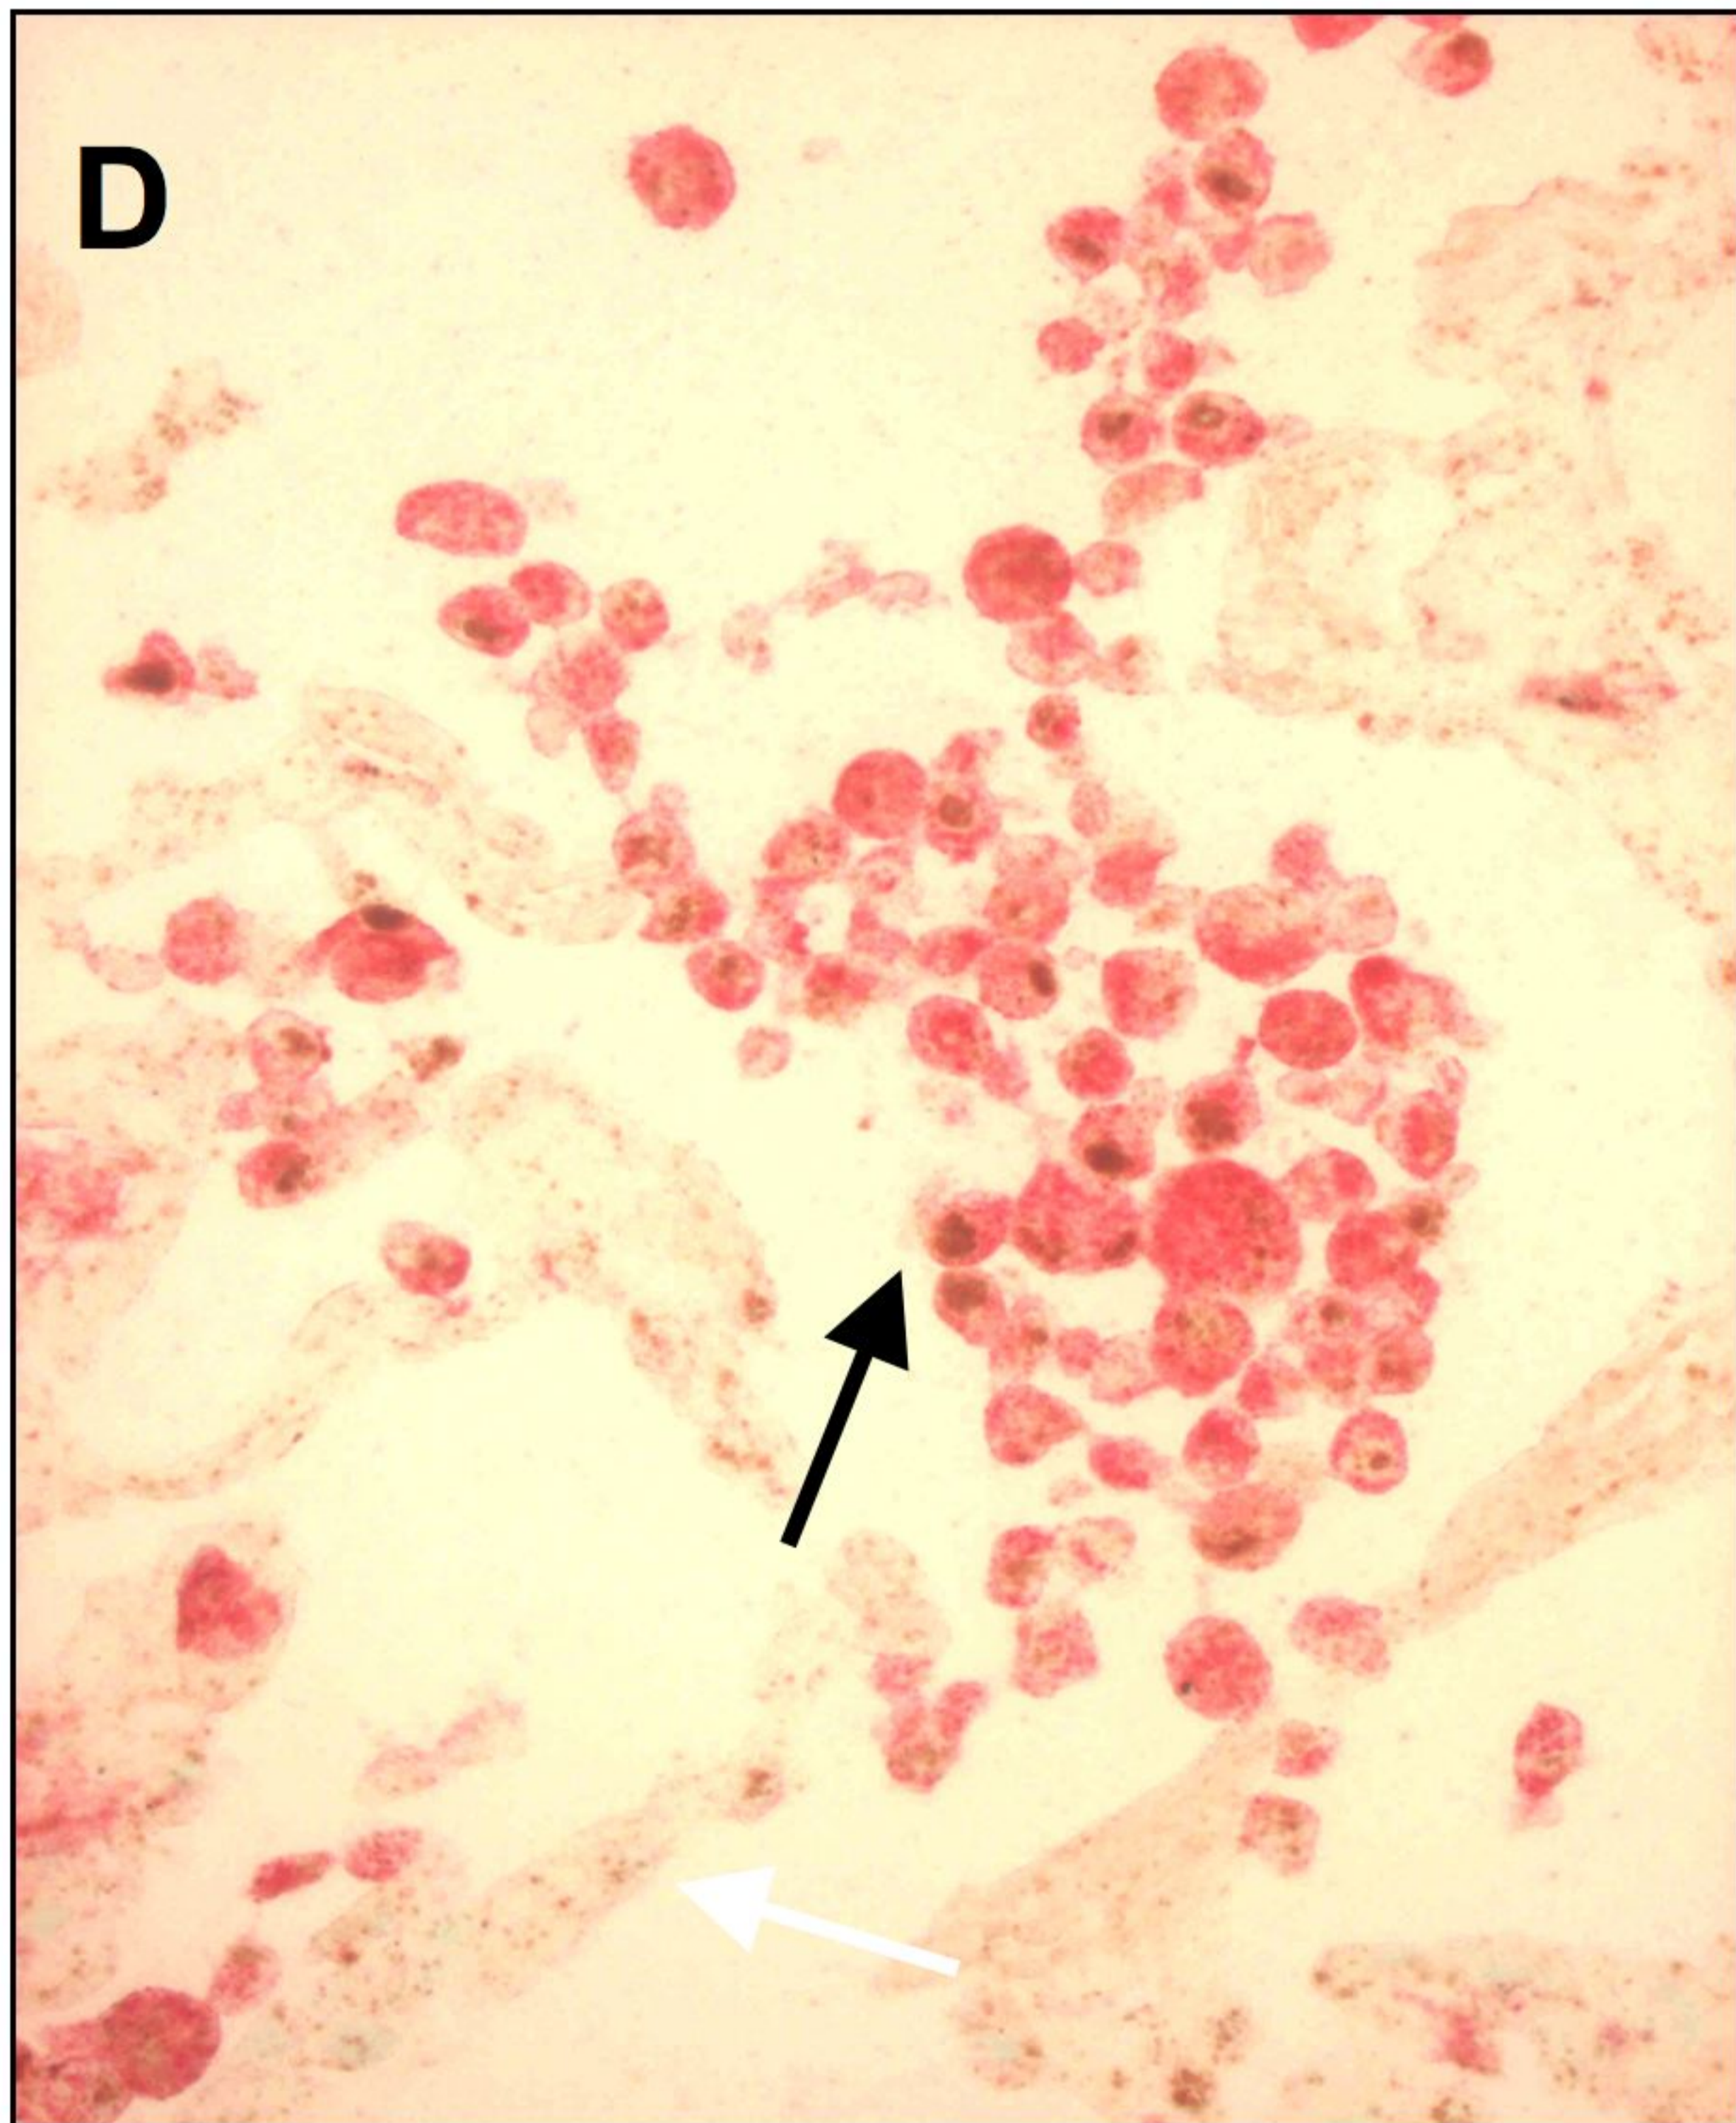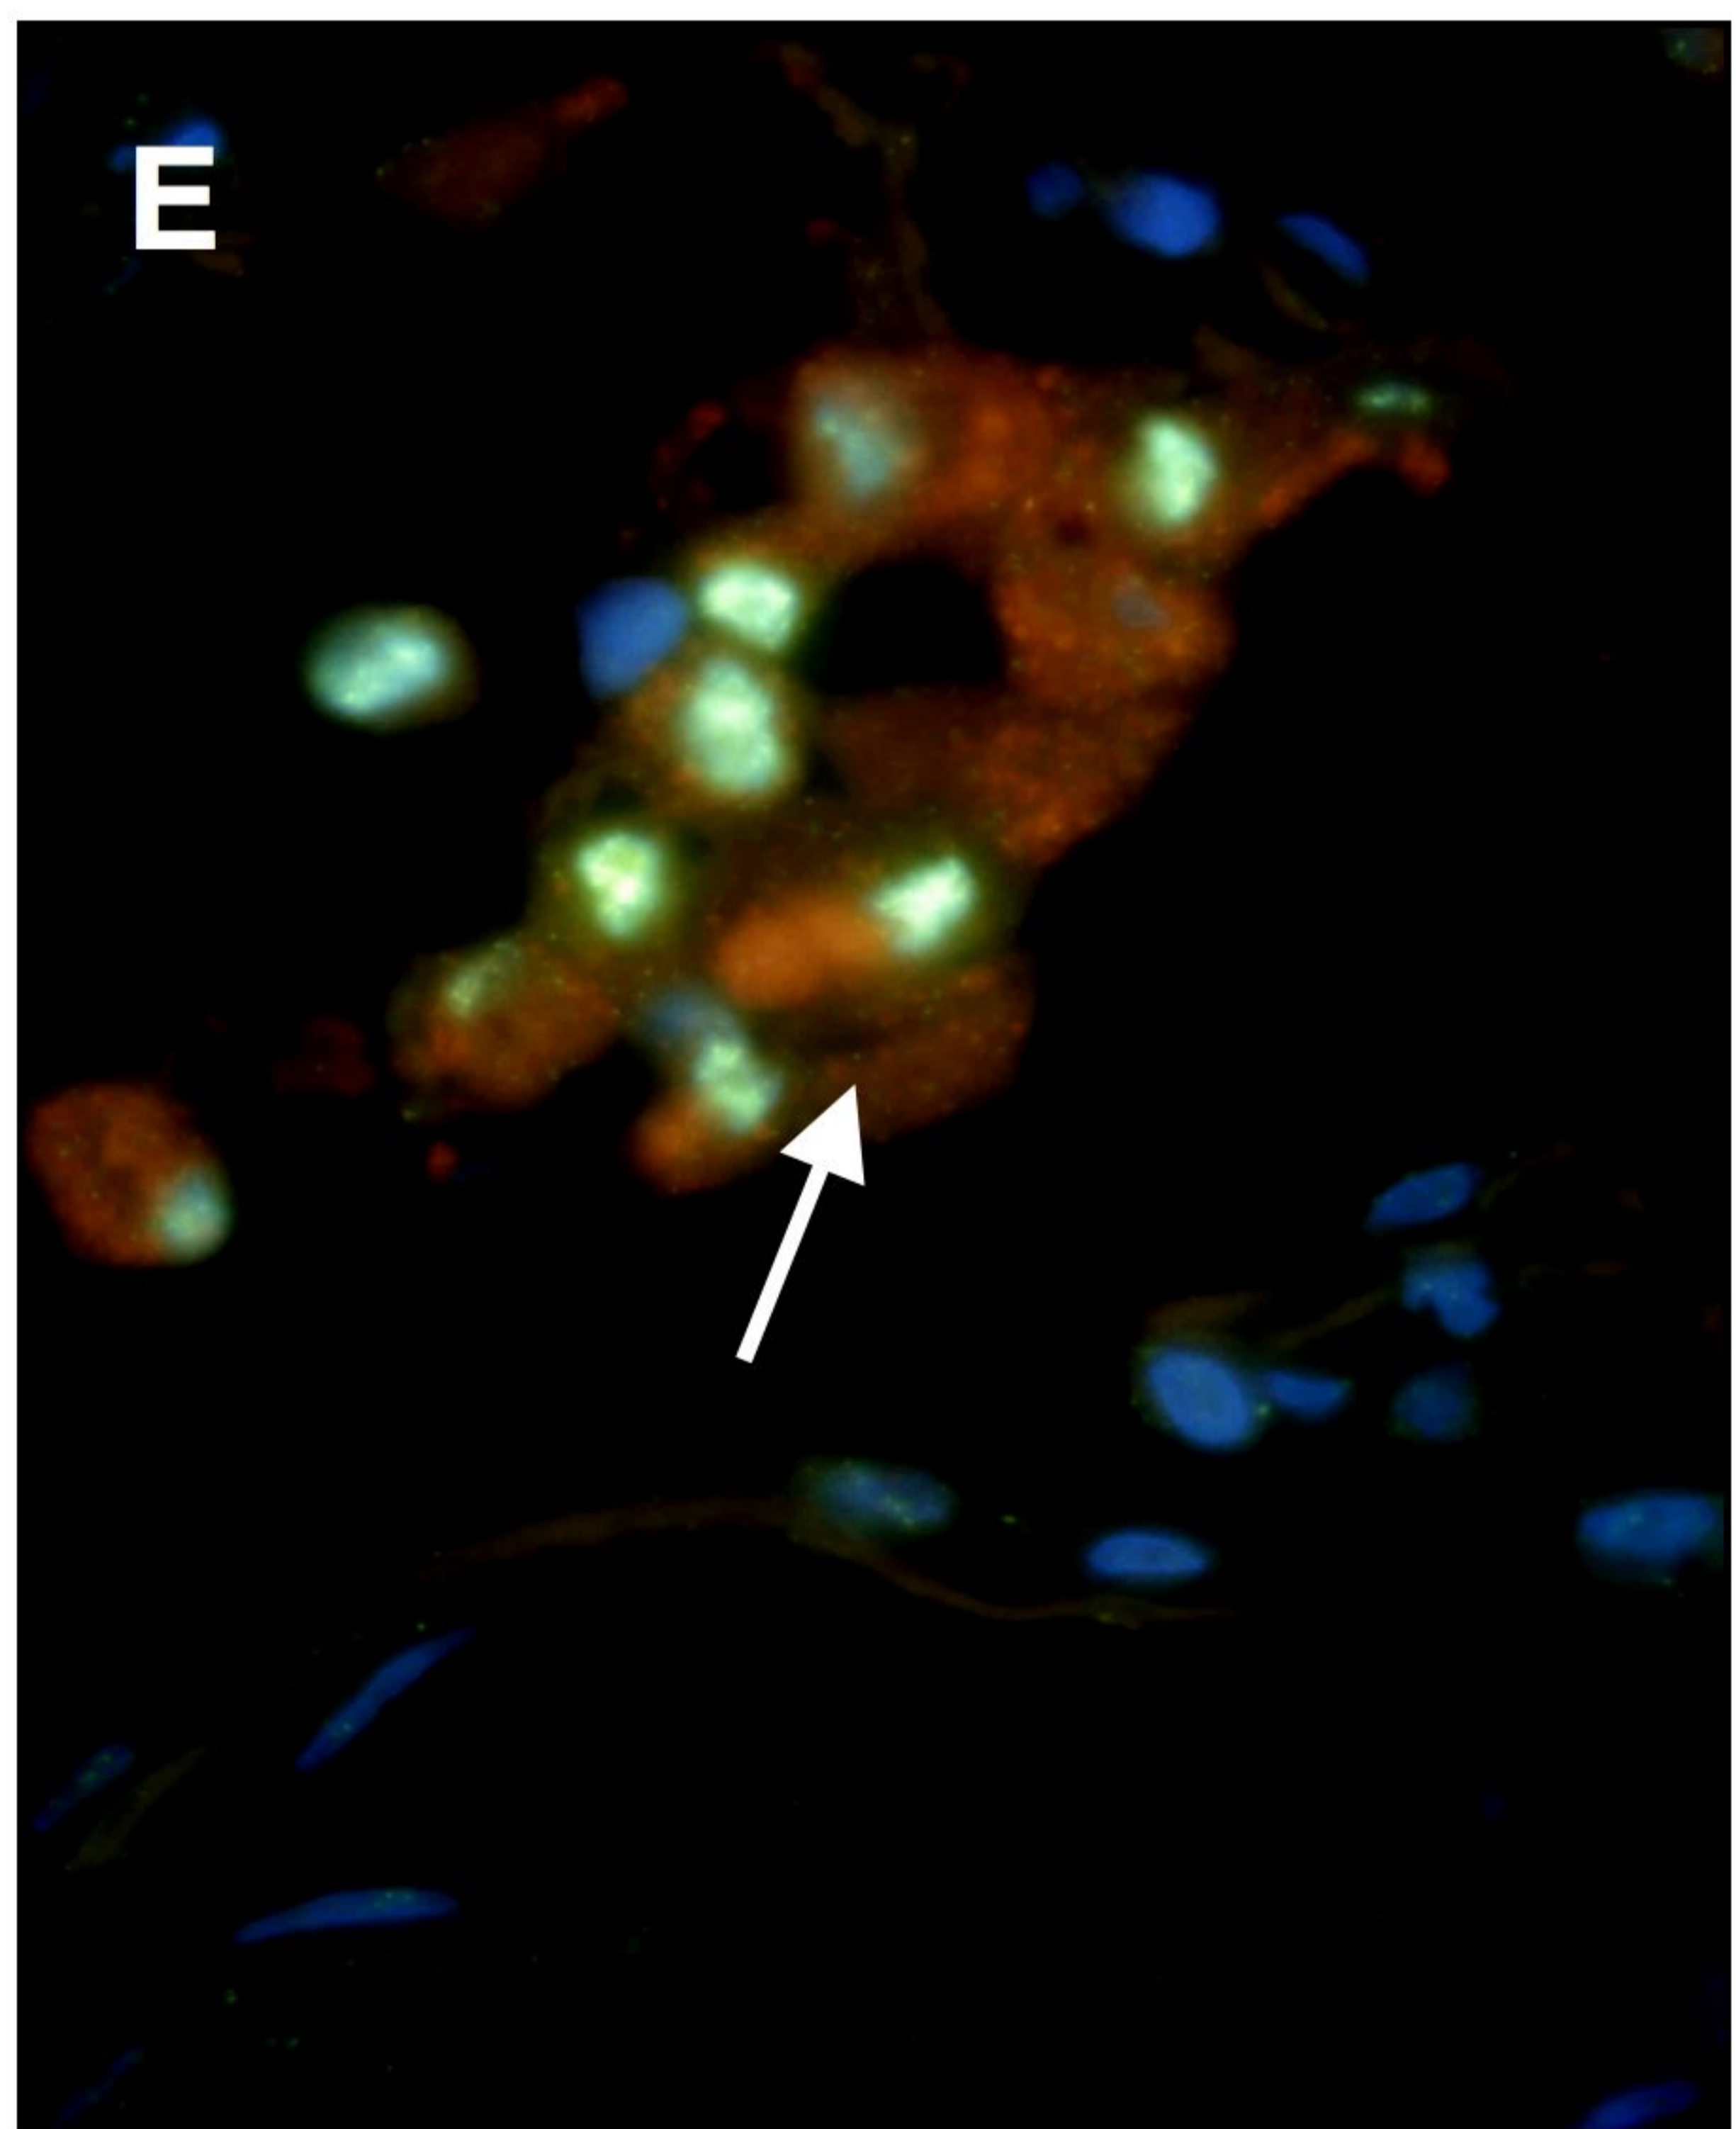

Supplement: MOESM2 [file 9450940]
